# Supplementary material for: Neutrophil Subsets Define Host Pathobiology Across Detrimental Sepsis Subtypes
Source: Research Square preprint supplement (doi:10.21203/rs.3.rs-7012220/v1), 2025-07-08
Supplement: Supplementary file 1 [file 4846cecde7a7989b4c8b783a.xlsx]

## Sheet: S.Table1-Sepsis Datasets
#	Dataset	Sepsis	Controls	Other	Sampling	Enrichment	Sequencing	Total Cells	Patients / Controls	Other Details	Pathogen
1	Reyes et al. (2020)​	Immune cell states and monocyte expansion in sepsis	Healthy individuals (n=36), ICU patients without sepsis	UTI-associated sepsis: mild (Int-URO) and severe organ dysfunction (URO) groups	PBMCs across different stages of infection	CD45+ PBMCs and LIN-, CD14-, HLA-DR+ dendritic cells enriched before sequencing	scRNA-seq	106545	Sepsis (n=29), Controls (n=36)	Identified surface markers for MS1 isolation and functional phenotypes. Highlighted metabolic changes linked to immunoparalysis.	Bacterial sepsis only
2	Jiang et al. (2020)​	Early monocyte gene signature in ARDS secondary to sepsis	Sepsis patients without ARDS	N/A	PBMCs within 24 hours of ARDS development or sepsis diagnosis	Enrichment of PBMCs	scRNA-seq	Not specified	Sepsis with ARDS (n=3), Sepsis-only (n=4)	Proposed a 29-gene ARDS risk score and observed endothelial barrier disruption linked to ATP2B1 expression.	Gram Negative Bacterial sepsis (n=4), Influenza (n=1), No pathogen (n=2)
3	Qiu et al. (2021)​	Single-cell temporal dynamics in PBMCs during fatal sepsis	Healthy volunteers	Survivors vs. non-survivors	PBMCs from patients with Gram-negative bacterial sepsis at 0 and 6 hours post-diagnosis	Enrichment of PBMCs	scRNA-seq	Not specified	Fatal (n=2), Survivors (n=3), Controls (n=Not specified)	Identified hypoxia-driven immune dysfunction and erythroid precursor expansion in fatal cases.	Gram Negative Bacterial Sepsis only
4	Hong et al. (2022)​	Focus on neutrophil heterogeneity and association with septic shock	Healthy individuals	SOFA score-based grouping of sepsis patients	Peripheral blood samples on days 1, 3, and 5	Neutrophils enriched for subtype analysis	scRNA-seq	290912	Sepsis (n=12), Healthy (n=Not specified)	Identified Neu1 subtype predictive of septic shock using Neu1_C module. Extensive validation across datasets.	Not available
5	Kwok et al. (2023)​	Immature and immunosuppressive neutrophil subtypes identified during sepsis	Post-cardiac surgery patients (sterile inflammation controls, n=7)	Convalescent sepsis patients sampled 1–3 months post-hospitalization	Whole blood samples analyzed using multi-omics	Whole blood profiling, including neutrophil and hematopoietic stem and progenitor cell (HSPC) enrichment	scRNA-seq, scATAC-seq, proteomics	272993	Sepsis (n=26), Controls (n=6), Post-CS (n=7)	Neutrophils with suppressive effects on CD4+ T cells linked to increased immature subsets and granulopoietic disturbances.	Not available

## Sheet: S.Table 2_cNMF Identity Program
Component 1	Component 2	Component 3	Component 4	Component 5	Component 6	Component 7	Component 8	Component 9	Component 10	Component 11	Component 12		Top 100 genes according to each cNMF program
MKI67	LCN2	IFITM2	CXCL9	IFIT3	LYZ	MS4A7	HLA-DRA	ITM2C	EEF1A1	NKG7	CD79A
TPX2	LTF	S100A9	LAD1	IFIT1	VCAN	CDKN1C	HLA-DPB1	PLD4	RPS12	GNLY	BANK1
TOP2A	MMP8	CSF3R	CCL19	IFI6	CD36	FCGR3A	HLA-DPA1	GZMB	RPS6	GZMA	TNFRSF13C
TYMS	CEACAM8	S100A11	UBD	IFIT2	FCN1	LST1	HLA-DRB1	IRF8	RPL5	PRF1	MS4A1
UBE2C	TCN1	SRGN	MARCKSL1	RSAD2	LGALS1	C1QA	HLA-DQA1	LILRA4	RPSA	KLRD1	LINC00926
RRM2	CD24	FPR1	LAMP3	ISG15	GPX1	CSF1R	CD74	C12orf75	RPS3	FGFBP2	IGHD
PCLAF	PGLYRP1	ALPL	TNFAIP2	MX1	TMSB10	C1QB	HLA-DQB1	AVP	RPL14	CCL5	P2RX5
CENPF	CRISP3	GCA	CD80	XAF1	CSTA	LILRB1	CST3	TSPAN13	RPS4X	CTSW	CD79B
BIRC5	OLFM4	SLC2A3	CCL17	OAS3	ATP5E	AIF1	HLA-DRB5	IRF7	RPL9	GZMH	CD22
CDK1	CAMP	VNN2	IDO1	HERC5	C14orf2	C1QC	CPVL	LINC02573	RPS27A	HOPX	BLK
HMMR	OLR1	NAMPT	FSCN1	IFI44L	ANXA2	NAP1L1	HLA-DQA2	CCDC50	RPL13	SPON2	PAX5
ASPM	BPI	S100A8	CXCR2	CMPK2	S100A10	LYPD2	CLEC10A	SERPINF1	RPL30	CD7	ADAM28
DLGAP5	SERPINB10	SELL	HLA-A	IFI44	SERF2	RHOC	FCER1A	STMN1	RPS18	CD247	CD83
CCNB2	ABCA13	PYGL	B2M	OAS2	PFDN5	LINC01272	HLA-DMA	SCT	RPS29	KLRF1	FCER2
CENPE	RETN	CST7	CCL22	GBP1	RPS24	HES4	C1orf54	CLEC4C	RPL3	IL2RB	RPS23
KIF11	HP	SLC25A37	SEC14L1	EPSTI1	SLC25A6	FTL	CD1C	TCL1A	IL7R	GZMM	VPREB3
NUSAP1	CPNE3	BASP1	HLA-C	GBP5	S100A4	MTSS1	TMSB4X	LRRC26	EEF1B2	CMC1	RPS11
CEP55	GPI	LCP1	HLA-B	PARP14	ASGR1	VMO1	HLA-DQB2	PTCRA	RPS8	ARL4C	RPS5
KIF2C	CHIT1	SERPINA1	CTGF	SAMD9L	ATP5G2	CX3CR1	CLEC9A	PPP1R14B	RPL32	HCST	RPL18A
NCAPG	COL17A1	CAP1	FCGR3B	OAS1	RPS9	RRAS	HLA-DMB	TCF4	RPS25	PYHIN1	EZR
CDCA5	CYBB	CD177	CXCL11	IFIT5	LRP1	LILRA1	RPL7	IL3RA	RPL10A	KLRB1	FCRL5
CDC20	INHBA	PGD	MT-RNR2	EIF2AK2	TCEB2	COTL1	LGALS2	NPC2	RPS20	GZMB	LINC02397
CCNA2	PTX3	MMP25	TXNIP	GBP4	TMEM176B	FTH1	ENHO	SEC61B	RPS15A	RUNX3	HLA-DQB1
TK1	STOM	CR1	HLA-E	PML	GSTP1	PSAP	PKIB	SPCS1	RPS3A	SAMD3	FCRLA
HIST1H4C	PADI4	MNDA	H3-3A	TAP1	UBA52	CD68	GSTP1	VIMP	RPS16	ADGRG1	STAG3
TUBB	CEACAM6	ALOX5AP	CXCL10	OASL	CD14	FBP1	SLC25A5	NPR3	RPLP0	TRDC	AFF3
CDCA2	CEBPE	BCL6	ITM2B	HLA-A	S100A6	SLC2A6	NDRG2	HERPUD1	RPL11	S1PR5	EBF1
STMN1	ERG	LITAF	CPPED1	APOL6	RP11-1143G9.4	CFD	ATP5A1	DNASE1L3	RPL37	PTGDR	JUND
HIST1H3B	HTRA3	DYSF	TAGLN2	DDX58	MPEG1	ZNF703	PPA1	RNASE6	RPL10	PRSS23	CD37
DEPDC1	RFLNB	ACSL1	CD83	STAT1	AP1S2	NAAA	RPL15	CLIC3	RPL19	MATK	LINC01857
CDKN3	S100A8	MCL1	FTH1P20	MX2	GAPDH	YBX1	SLC25A6	DERL3	RPS5	C1orf21	RPS8
GTSE1	OR6N1	LILRB3	NCOA4	ZCCHC2	RPLP1	NEURL1	ATP5C1	BCL11A	TPT1	CCL4	RALGPS2
TUBA1B	UGCG	IQGAP1	TMEM154	TRIM22	CST3	TMSB4X	ATP5L	PTGDS	RPS21	CD160	RPL30
HJURP	ACTG1	IL1R2	DUSP6	IFITM1	BLVRB	CKB	YBX1	CD74	LDHB	CEP78	BTG1
PTTG1	MS4A3	SORL1	FTH1P10	FCGR3B	MGST1	NR4A1	ATP5F1	SMIM24	RPS13	TBX21	CD19
KIF4A	MMP9	SERPINB1	BTG2	SAMD9	CLU	NPC2	EIF3L	APP	RPL6	CD2	CD74
ZWINT	CEACAM1	MGAM	H3-3B	SERPING1	FTL	ABI3	LY86	SMPD3	RPL34	FCRL6	COBLL1
SPC25	LINC02009	MAPK14	SIGLEC10	SP110	CCR2	SLC7A7	ATP5B	JCHAIN	RPL4	FYN	RPL18
ANLN	CHI3L1	AQP9	C5AR1	IFIH1	RNASE2	LINC02432	ACTB	TPM2	RPS27	CD99	RPL7A
TROAP	VEPH1	ZYX	EBI3	HLA-C	H3F3A	FAM26F	BTF3	MYCN	RPS2	XCL2	RPL29
BUB1	ADSS2	S100P	PPA1	RNF213	ALDOA	POU2F2	CACNA2D3	SEC61G	RPS14	DUSP2	RPL37
FOXM1	TLCD4	FYB1	RESF1	LY6E	ATP5L	MYOF	CALM2	SMIM5	RPL35A	LYAR	RPL8
E2F8	LYZ	NCF2	CLEC7A	HLA-E	RPL37A	SCIMP	PFN1	CD34	RPL18	ID2	RPSA
CKAP2L	FCN1	RTN3	P2RY13	DDX60	ASGR2	OAS1	CLIC2	PTPRS	RPS23	ARPC5L	EEF1B2
SPC24	ARG1	MCEMP1	YPEL3	TNFSF10	KCTD12	CD86	AP1S2	C1orf186	RPS28	F2R	RPL19
CENPA	ANXA1	VSIR	VMP1	ADAR	TMSB4X	GPBAR1	CD1E	LINC00996	RPL36	IL32	HLA-DRA
NUF2	LDHA	RIPOR2	NIBAN1	APOBEC3A	TYROBP	SPN	RPL34	MZB1	RPL23A	ABHD17A	NIBAN3
PCNA	EMB	CMTM2	CSF2RB	PARP9	MT-CO1	FMNL2	ATP5J2	SPIB	RPL31	KLRC1	RPL13
SKA1	SVIP	SLC11A1	FTH1	IFITM3	TMEM176A	IFI30	RPS2	VAMP8	NPM1	UBB	FAU
KIF20A	TFF3	IL17RA	RAB11FIP1	B2M	CTSB	CD52	SNX3	C3orf80	RPL29	PTPN4	IGHM
HIST1H1B	CLINT1	ACTN1	SMAP2	GBP2	POLR2L	WARS	ATP5O	FAM213A	RPL22	EVL	ODC1
MELK	FAR2	CYSTM1	SOD2	IRF1	C4orf48	CST3	CD86	LGMN	RPLP2	APOBEC3G	NOP53
CCNB1	BCL2L15	DUSP1	INKA2	STAT2	SH3BGRL3	CAMK1	PSMA2	OPN3	RPL24	MYBL1	RPL11
PLK1	PLBD1	FCGR2A	IFIT3	LAP3	COX4I1	PPP1R17	ATP5G3	GAS6	CD3E	KLRG1	RPL9
KNL1	MYL6	NCF4	ATP6V1B2	HELZ2	TGFBI	ATP1B3	RPL21	SRP14	RPL13A	TGFBR3	RAB30
KIF23	AC008771.1	CD55	AC012368.1	IFI16	AP2S1	VAMP5	GNB2L1	2025-09-15	RPL7A	SH2D1B	RPS27A
DTL	ENPP4	BCL2A1	CXCR1	FFAR2	LGALS2	SIDT2	HNRNPA1	LAMP5	RPS7	SKAP1	ISG20
PRC1	ANXA3	R3HDM4	PHOSPHO1	HLA-B	C10orf54	ANXA2	ARPC1B	HIGD1A	RPL21	MALAT1	RPS7
SMC2	ATP8B4	S100A12	IFIT2	TMEM123	UQCR11	UICLM	RPS18	BLNK	RPL39	LAIR2	COL19A1
NCAPH	S100P	FLOT2	LYN	UBE2L6	CYBB	CTSL	AXL	IDH3A	RPL38	NCR3	RPS21
HMGN2	S100A9	MSRB1	LITAF	WARS	RPL38	TIMP1	RNH1	CYB561A3	RPL27A	EOMES	HSP90AB1
CIT	SFXN1	MXD1	RNF19B	IFI27	RPL27	CSTB	RPS13	COMMD6	RPS10	CHST12	RPL10A
CDCA3	SUSD3	ITGAX	ACHE	PLEK	FAM198B	LY6E	RNASE6	PARK7	RPL12	CD8A	YBX3
KIF15	CKAP4	CFLAR	AL022725.1	IL1RN	GPX4	S100A4	TMEM14C	TNFRSF21	MAL	TRGC2	RPL12
KIFC1	GYS1	FCGR3B	CXCR4	FYB1	ATP5I	TCF7L2	HMGN1	CRHBP	RPL41	TXK	TLE1
RAD51	CDCA7L	ALOX5	ADGRE2	TNFSF13B	RPLP2	UMODL1	2025-09-15	OSTC	RPL18A	MYOM2	STAP1
FBXO5	HMGN2	MYH9	WAS	SELL	VAMP8	ICAM4	RPS3A	MAP1A	RPL28	TTC38	CD40
AURKA	RGL4	SDCBP	EVI2B	SHISA5	CD52	TPPP3	RPL3	RP11-73G16.2	RPL23	RARRES3	RPS27
SHCBP1	RGCC	PTPRC	PTAFR	SHFL	GNB2L1	RPS19	EIF3E	PHB	RPS26	B2M	PCDH9
NEK2	ACTB	MMP9	THBD	H3-3A	LY86	TMEM176B	ATP5J	CRYGD	IL32	DTHD1	RPL23A
AURKB	VSTM1	PROK2	RGS2	SLC26A4-AS1	CPVL	HMOX1	C14orf2	SOX4	RPL37A	RORA	CD72
DEPDC1B	NAV2	ITM2B	CHI3L1	APOL1	RPS17	CD300E	HINT1	CYBA	RPS19	PRKCH	RPS18
CDCA8	GGTA1P	RAC2	OGFRL1	ZBP1	RPS15	MRAS	C14orf166	CALM2	TCF7	LY6E	RPL5
SMC4	CD177	CNN2	PECAM1	TNFAIP2	SAMHD1	ISG15	ATP5G2	OFD1	LEF1	CLIC3	RPS10
H4C3	S100A12	RNF149	ZFP36	NADK	ATP5D	EPB41L3	C1QBP	MYBL2	RPLP1	LCK	RACK1
KIF14	MT-CO1	VASP	MNDA	CCR1	COX8A	SLC25A6	RPL26	FAM129C	RPL8	TRGC1	FCRL2
HIST1H2AL	CA4	PLXNC1	FCGR2A	H3-3B	RPL26	PPDPF	ARL5A	AC011893.3	CD3D	AKR1C3	TCL1A
CKS1B	FOLR3	C5AR1	IGSF6	AP5B1	RPL23	TMSB10	USMG5	TM4SF1	RPS15	SH2D2A	HLA-DPA1
H2AFZ	DENND2C	RNF10	TAP1	ETV7	RPL28	MS4A4A	H2AFY	CDK6-AS1	CD3G	SH2D1A	RPS19
UBE2T	PLAC8	ITGAM	ZFP36L1	PHF11	AHNAK	PRELID1	DNASE1L3	TXN	RPL26	FKBP11	RPS16
NCAPG2	CCDC125	DOK3	IRF1	ZNF648	COX7C	TUBA1B	RPS14	SPCS2	PIK3IP1	IGFBP7	HLA-DMB
POLQ	CTSD	LYN	FYB1	CXCL10	RPL39	CTSS	RGS10	RP1-244F24.1	RPL27	IKZF3	RPL32
MCM10	YWHAH	HCK	NADK	TAP2	NDUFB1	MEG3	NDUFA12	C12orf45	RPL15	ZAP70	RPS3A
PLK4	ATP2C2	LRP10	IL4I1	WAS	UQCRH	LPL	LGMN	FKBP2	NACA	CALM1	HLA-DOB
MCM4	PFN1	APBB1IP	SIRPB1	CNN2	RPL36A	LILRB2	MYL12A	RP11-117D22.2	HNRNPA1	GNPTAB	BACH2
CLSPN	TSPO	SPI1	MBP	LGALS9	RPL31	MT-CO1	SUB1	PLA2G16	CCR7	STAT4	RPL39
TTK	VIM	LRRK2	SLC15A4	ZC3HAV1	H2AFJ	DRAP1	SHFM1	TRAF4	RCAN3	SPN	RPLP0
CENPM	GAPDH	G0S2	RIPOR2	SP100	RPL27A	IFITM3	RPL27A	GPR183	SPOCK2	NCAM1	RPS13
EXO1	KLF5	MEGF9	AL353608.3	C5AR1	FYB	FAM110A	NDUFB5	PRSS57	BTF3	PLEKHF1	RPL37A
CDT1	RAB27A	XPO6	OAZ2	KPNB1	RPL7	EMP3	PTMA	PROM1	BCL11B	CD81	RPS2
SPAG5	CITED4	ARRB2	CYRIB	PARP12	RPS13	TAGLN	RPS17	UGCG	RPL7	CX3CR1	PTMA
RAD51AP1	SLC2A5	GNAI2	MT-RNR1	BATF2	CYBA	IFI6	OSTC	USMG5	RPL35	SYTL2	RPS20
DUT	LGALS3	PADI2	RNF149	SCO2	NPC2	CYP4F22	VAMP8	TRAM1	TRAC	IFNG	BIRC3
SGO2	FAM151B-DT	CKAP4	PTPRC	RNF19B	RPL35	AC104809.2	NDUFV2	PSMA2	EIF3E	RNF125	FCMR
MND1	H1-0	LRG1	HMSD	SECTM1	CTSD	C10orf54	PPIA	RP11-476B1.1	RACK1	LAG3	RPL22
ARHGAP11A	CLC	GYG1	TAGAP	TRANK1	OAZ1	LGALS3	TUBA1B	CXCR3	TOMM7	CD96	LINC01781
IQGAP3	DZIP1L	MSL1	PTGS2	MNDA	CD33	ADA	PABPC1	GPM6B	EEF2	GZMK	RPL41
CCNF	OIP5-AS1	RHOG	MXD1	HSH2D	TYMP	MPEG1	ANXA2	RPL34	TRAT1	CBLB	RPLP1
RRM1	CALM1	LSP1	CDC42SE1	ISG20	COX6B1	ABRACL	PON2	RPL7	RPS11	TFDP2	FAM30A
HMGB2	GGTA1	CLEC4E	FRAT2	GIMAP4	CTSS	FCER1G	PSMA4	TMEM258	SARAF	PFN1	EEF1A1

## Sheet: S.Table 3_DEGs Sepsis Subtype
Hyperinflammatory (Neyton et al.)		MARS2 (Scicluna et al.)		Endotype A (Wong et al.)		Phenotype 1 (Atreya et al.)		Inflammopathic (Sweeney et al.)		Hyperinflammatory (Bos et al.)
LCN2	up	MMP8	up	ZNF521	up	PRTN3	up	MMP8	up	MMP8	up
MMP8	up	CD177	up	KIF26B	up	ELANE	up	LCN2	up	OLFM4	up
OLFM4	up	ZDHHC19	up	IGLV3-27	up	CTSG	up	OLFM4	up	GPR84	up
LTF	up	OLFM4	up	MECOM	up	DEFA3	up	PCOLCE2	up	RETN	up
RETN	up	GPR84	up	RN7SL3	up	DEFA4	up	LTF	up	LCN2	up
METTL7B	up	HPGD	up	TNFRSF21	up	CCL4	up	CEACAM8	up	ZDHHC19	up
SERPINB2	up	SMPDL3A	up	SLC6A19	up	HBB	up	RETN	up	CD177	up
TCTEX1D1	up	C9orf103	up	SDC2	up	G0S2	up	ZDHHC19	up	SMPDL3A	up
CD24	up	RETN	up	SEMA3A	up	NEIL3	up	TCN1	up	TCN1	up
GPR84	up	LCN2	up	SDC1	up	CEP55	up	OLAH	up	CD24	up
TCN1	up	TDRD9	up	RNY1	up	RPS23P8	up	TDRD9	up	DHRS9	up
SMPDL3A	up	PCOLCE2	up	PXDN	up	KIF20A	up	HP	up	LTF	up
HP	up	ATP9A	up	IGHG4	up	KIF14	up	METTL7B	up	HP	up
DEFA1B	up	GALNT2	up	HBG2	up	NCAPH	up	GPR84	up	CEACAM1	up
PRTN3	up	IDI1	up	CBX2	up	ANLN	up	SLC51A	up	CLEC4D	up
BPI	up	HP	up	KLHL33	up	KIF15	up	BMX	up	PDSS1	up
ANKRD22	up	LAIR1	up	LINC01013	up	SKA3	up	CA4	up	PDE4D	up
CRISP3	up	CLEC4D	up	EHD2	up	KCNK5	up	ATP9A	up	EXOSC4	up
MS4A4A	up	CYP19A1	up	ARHGAP23	up	NCAPG	up	HGF	up	IDI1	up
PTTG1	up	EMB	up	SOD1P3	up	ZWINT	up	RGL4	up	BPI	up
HIST1H2AJ	up	GALNT14	up	LAG3	up	DTL	up	DDAH2	up	ANKRD22	up
DEFA3	up	EXOSC4	up	EPX	up	CENPU	up	DHRS9	up	PLAC8	up
NKG7	up	PDSS1	up	ZNF462	up	SCRT2	down	CEACAM1	up	CYP19A1	up
SLC39A8	up	OLAH	up	AKAP12	up	PRLR	down	IL18R1	up	RGL4	up
HIST1H1B	up	METTL7B	up	UGT2B11	up	ADGRE3	down	ARG1	up	THBS1	up
SERPINB10	up	ARG1	up	TRBV20-1	up	FSTL4	down	IL10RB-AS1	up	TDRD9	up
ANLN	up	GGT1	up	DBH-AS1	up	LGALSL-DT	down	CLEC5A	up	SVIP	up
MERTK	up	RGL4	up	IGKV5-2	up	HCAR2	down	ATP8B4	up	VNN1	up
CLEC5A	up	DACH1	up	SOCS2-AS1	up	RAMP3	down	ATP11B	up	ARG1	up
HIST1H2AB	up	NLRC4	up	KRT1	up	MIR3939	down	CRISP3	up	ATP8B4	up
HIST1H3J	up	TP53I3	up	SLC9A3R2	up	OLIG2	down	PDGFC	up	GADD45A	up
LIPM	up	ST6GALNAC3	up	IGLV3-1	up	LINC02978	down	EXOSC4	up	PCOLCE2	up
HIST1H3F	up	CCNA1	up	NEURL1B	up	USP32P3	down	MS4A4A	up	SLC25A40	up
CDK1	up	PLB1	up	ZNF704	up	SHE	down	MERTK	up	HPGD	up
ENPP4	up	DHRS9	up	PCOLCE2	down	ARHGEF10L	down	DAAM2	up	SAMSN1	up
TIMP4	up	ANKRD34B	up	BSND	down	RNU6-341P	down	CCNA1	up	AGL	up
HIST1H2BB	up	SLC25A40	up	LINC02068	down	XPC-AS1	down	ST3GAL4-AS1	up	G0S2	up
FFAR3	up	PDE4D	up	LINC01581	down	SLC9A7P1	down	NAIP	up	CHIT1	up
ADAMTS3	up	VNN1	up	CLRN1-AS1	down	CMTM2	down	OPLAH	up	COL17A1	up
HGF	up	PLAC8	up	ACTBP8	down			GRB10	up	CCNA1	up
CYYR1	up	NECAB1	up	OCLNP1	down			TCL1A	down	TP53I3	up
ZDHHC19	up	OPLAH	up	TAS2R40	down			NELL2	down	TFRC	up
CCNA2	up	TTC35	up	HGF	down			TRAC	down	NKG7	up
CEACAM1	up	MAP2K6	up	NOS1AP	down			CD2	down	LAIR1	up
VSTM1	up	CEACAM1	up	FLT1P1	down			NPRL3	down	IL1R2	up
S100A12	up	BMX	up	FGF13	down			UCP2	down	PILRA	down
SLC28A3	up	CA4	up	RNU6-1013P	down			AK1	down	RNASE6	down
GZMK	down	TBC1D8	up	MOXD2P	down			LBH	down	MX1	down
MINDY4B	down	IL1R2	up	MMP9	down			TARP	down	ASPRV1	down
RAMP3	down	PLEK2	down	CD177P1	down			IL7R	down	GBP5	down
ABCD2	down	TNS1	down	ADAMTS3	down			HLA-DQA1	down	TREM1	down
GRAMD1C	down	SESN3	down	IL1RAP	down			GPR18	down	FGL2	down
CLEC17A	down	TSPAN5	down	LINC02218	down			ST6GALNAC4	down	TNFAIP2	down
XCL2	down	KLF1	down	ANKRD34B	down			REXO2	down	DPEP2	down
ASPRV1	down	SLC4A1	down	HPGD	down			XK	down	CFD	down
LINC02218	down	ABCC13	down	KCNE5	down			MAL	down	OASL	down
CLRN1	down	IFI27	down	GCNT1P3	down			FAM46C	down	RPS6KA5	down
HAL	down	STRADB	down	OR10AE3P	down			PLEK2	down	KRT23	down
GPR15	down	GMPR	down	PFKFB2	down			MYL4	down	CPVL	down
NOV	down	C14orf45	down	CD300LD	down			GLRX5	down	C14orf159	down
TRAT1	down	FECH	down	PROK2	down			SH2D1A	down	CECR1	down
ANTXRL	down	SNCA	down	SDR42E1P5	down			HMBS	down	IFIT1	down
GPR68	down	CA1	down	HRH4	down			SRRD	down	IFIT3	down
SCRT2	down	ANK1	down	KRT8P3	down			SLC6A8	down	RBP7	down
KIAA0319	down	AHSP	down	RN7SKP296	down			BCL2L1	down	HAL	down
SLC12A1	down	EPB42	down	LINC00676	down			FAXDC2	down	SULF2	down
MME	down	IFIT3	down	GAPDHP52	down			OPTN	down	MME	down
ADGRE3	down	BPGM	down	LRG1	down			ODC1	down
FCER1A	down	IFIT1	down					HEMGN	down
EPHB1	down	HEMGN	down					ALAS2	down
TIGD3	down	GYPB	down					TUBB2A	down
KY	down	SELENBP1	down					TMOD1	down
HBA2	down	HBD	down					STRADB	down
HBB	down	FAM46C	down					TRDV3	down
HBA1	down	IFIT1B	down					GZMA	down
		RSAD2	down					SLC25A39	down
		KRT1	down					CCDC176	down
								KLF1	down
								MS4A1	down
								AHSP	down
								SNCA	down
								GMPR	down
								FECH	down
								ALDH5A1	down
								TSPAN5	down
								GZMK	down
								IFI27	down
								DMTN	down
								GYPB	down
								KRT1	down
								LRRN3	down
								SELENBP1	down
								EPB42	down
